# Supplementary material for: Endothelial arginase 2 mediates retinal ischemia/reperfusion injury by inducing mitochondrial dysfunction
Source: PubMed Central journal article supplement — Mol Metab. 2021 Jun 15;53:101273. doi: 10.1016/j.molmet.2021.101273 (PMC8274341; doi:10.1016/j.molmet.2021.101273), 2021-06-15

Figure S1: OCT images of WT and A2KO retinas at 5 weeks after I/R

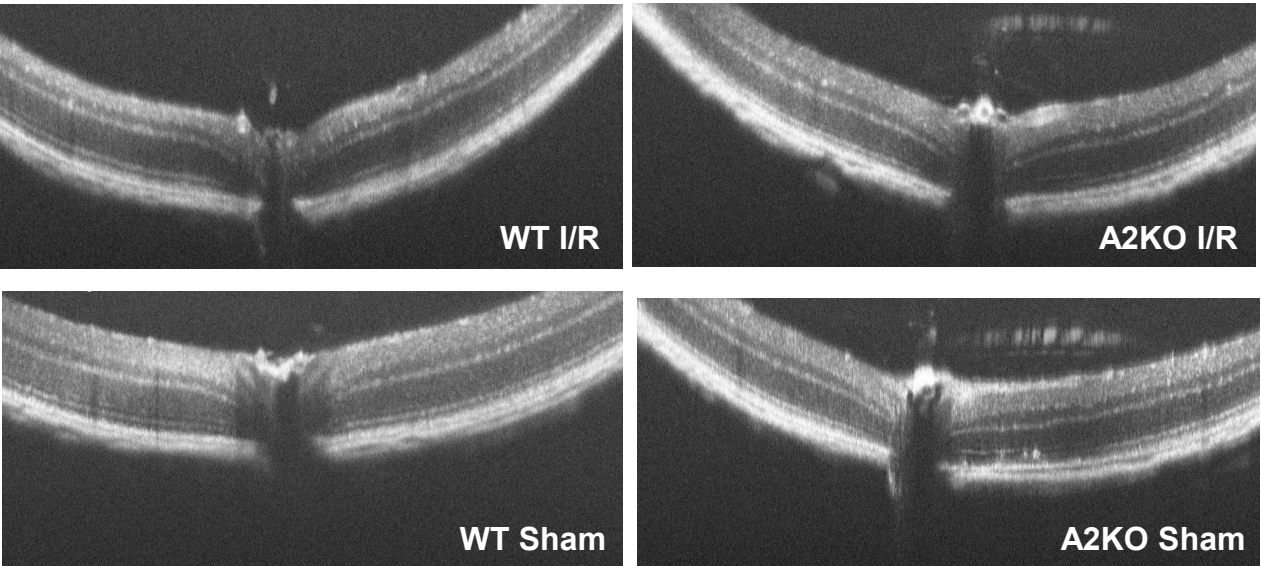

Figure S2: Histological analysis of retinas from myeloid-specific A2 knockout (M-A2KO) and endothelial-specific A2 knockout (E-A2KO) mice

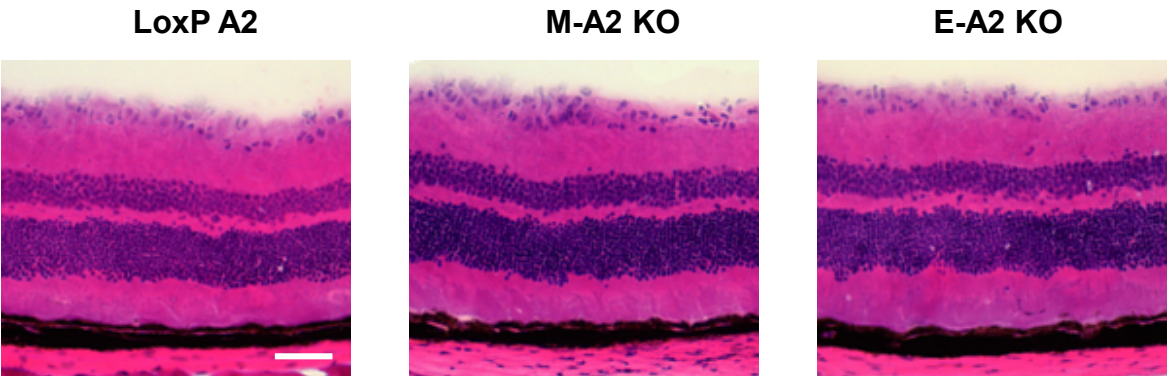

Figure S3: The effect of arginase inhibition on OGD/R-induced cell death in BREC

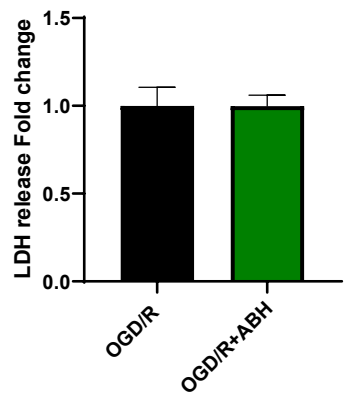

Figure S4: Increased Drp1 expression after retinal I/R

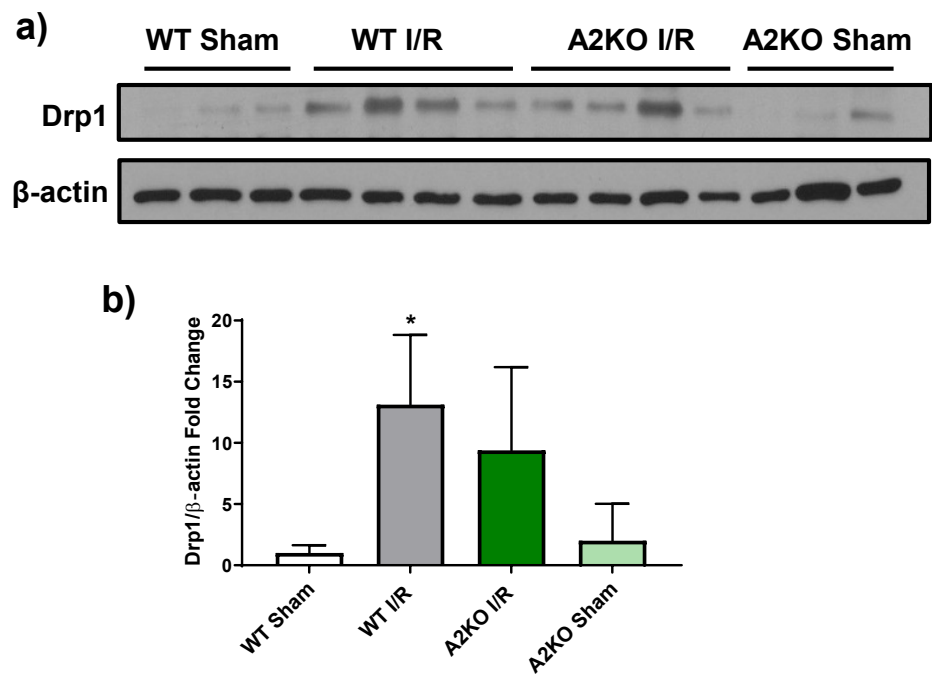

Figure S5: Basal respiration levels of BREC transduced with RFP and ΔA1

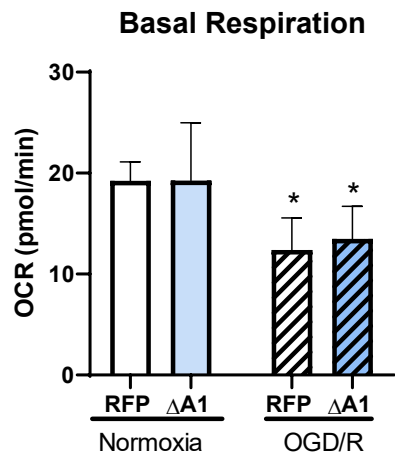

Figure S6: The Dose response analysis for different MOI of A2 transduction in BREC

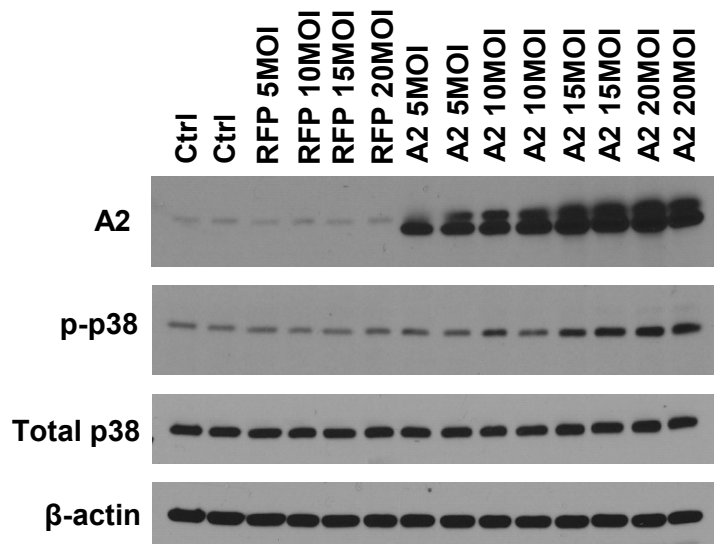

Supplement: mmc1.pdf [file mmc1.pdf]
